# Supplementary material for: Syntheses, structures and properties of five entangled coordination polymers constructed with trigonal N-donor ligands
Source: Royal Society of Chemistry journal article supplement (doi:10.1039/c5ra19086j), 2016-01-01
Supplement: c5ra19086j1.pdf [file c5ra19086j1.pdf]

## Supporting Information

### Syntheses, structures and properties of five entangled coordination polymers constructed with trigonal N-donor ligands

Yu Chen, Juan Yang, Xi-Chi Wang, Yu-Ci Xu, Hui-Ling Xu, Xiao-Shan Zeng and Dong-Rong

Xiao\*

Table S1 Selected bond lengths (Å) and angles (°) for 1-5.

| Compound 1          |            |                     |           |
|---------------------|------------|---------------------|-----------|
| Co(1)-O(1)#1        | 1.9931(15) | O(5)-Co(1)-O(2)#1   | 96.80(6)  |
| Co(1)-O(2)#1        | 2.3442(16) | O(5)-Co(1)-N(1)     | 93.54(7)  |
| Co(1)-O(3)          | 2.0002(18) | N(1)-Co(1)-O(2)#1   | 164.83(6) |
| Co(1)-O(5)          | 2.0028(15) | O(7)#2-Co(2)-O(7)   | 180.0     |
| Co(1)-N(1)          | 2.0484(18) | O(7)#2-Co(2)-N(3)#3 | 86.62(6)  |
| Co(2)-O(7)#2        | 2.0965(15) | O(7)#2-Co(2)-N(3)#4 | 93.38(6)  |
| Co(2)-O(7)          | 2.0965(15) | O(7)#2-Co(2)-N(6)   | 92.42(6)  |
| Co(2)-N(3)#3        | 2.2067(16) | O(7)#2-Co(2)-N(6)#2 | 87.58(6)  |
| Co(2)-N(3)#4        | 2.2067(16) | O(7)-Co(2)-N(3)#3   | 93.38(6)  |
| Co(2)-N(6)          | 2.1266(17) | O(7)-Co(2)-N(3)#4   | 86.62(6)  |
| Co(2)-N(6)#2        | 2.1266(17) | O(7)-Co(2)-N(6)     | 87.58(6)  |
| O(1)#1-Co(1)-O(2)#1 | 60.27(6)   | O(7)-Co(2)-N(6)#2   | 92.42(6)  |
| O(1)#1-Co(1)-O(3)   | 98.25(8)   | N(3)#4-Co(2)-N(3)#3 | 180.00(8) |
| O(1)#1-Co(1)-O(5)   | 128.49(7)  | N(6)#2-Co(2)-N(3)#3 | 85.82(6)  |
| O(1)#1-Co(1)-N(1)   | 104.58(6)  | N(6)#2-Co(2)-N(3)#4 | 94.18(6)  |
| O(3)-Co(1)-O(2)#1   | 88.04(8)   | N(6)-Co(2)-N(3)#3   | 94.19(6)  |
| O(3)-Co(1)-O(5)     | 128.47(7)  | N(6)-Co(2)-N(3)#4   | 85.81(6)  |
| O(3)-Co(1)-N(1)     | 94.19(8)   | N(6)-Co(2)-N(6)#2   | 180.0     |
| Compound 2          |            |                     |           |
| Ni(1)-O(1)          | 2.0869(13) | O(5)-Ni(1)-N(5)#2   | 87.81(6)  |
| Ni(1)-O(5)          | 2.0933(15) | N(1)-Ni(1)-O(5)     | 176.86(7) |
| Ni(1)-O(6)          | 2.1214(16) | N(1)-Ni(1)-O(6)     | 89.11(7)  |
| Ni(1)-N(1)          | 2.0885(15) | N(1)-Ni(1)-N(5)#2   | 91.50(6)  |

|                   |            |                     |           |
|-------------------|------------|---------------------|-----------|
| Ni(1)-N(3)#1      | 2.0833(15) | N(3)#1-Ni(1)-O(1)   | 87.78(6)  |
| Ni(1)-N(5)#2      | 2.0958(15) | N(3)#1-Ni(1)-O(5)   | 91.26(7)  |
| O(1)-Ni(1)-O(5)   | 90.60(6)   | N(3)#1-Ni(1)-O(6)   | 172.66(7) |
| O(1)-Ni(1)-O(6)   | 84.95(6)   | N(3)#1-Ni(1)-N(1)   | 91.85(6)  |
| O(1)-Ni(1)-N(1)   | 89.88(6)   | N(3)#1-Ni(1)-N(5)#2 | 96.02(6)  |
| O(1)-Ni(1)-N(5)#2 | 175.91(6)  | N(5)#2-Ni(1)-O(6)   | 91.22(6)  |
| O(5)-Ni(1)-O(6)   | 87.84(7)   |                     |           |

#### Compound 3

|                   |            |                     |           |
|-------------------|------------|---------------------|-----------|
| Cu(1)-O(1)        | 2.0278(13) | O(2)#1-Cu(1)-O(3)#2 | 149.71(5) |
| Cu(1)-O(2)#1      | 1.9548(13) | O(2)#1-Cu(1)-N(1)   | 87.42(6)  |
| Cu(1)-O(3)#2      | 2.0251(12) | O(2)#1-Cu(1)-N(2)#3 | 116.52(6) |
| Cu(1)-N(1)        | 2.0418(16) | O(3)#2-Cu(1)-O(1)   | 92.08(5)  |
| Cu(1)-N(2)#3      | 2.2738(15) | O(3)#2-Cu(1)-N(1)   | 86.54(6)  |
| O(1)-Cu(1)-N(1)   | 176.67(6)  | O(3)#2-Cu(1)-N(2)#3 | 93.50(5)  |
| O(1)-Cu(1)-N(2)#3 | 89.18(5)   | N(1)-Cu(1)-N(2)#3   | 93.92(6)  |
| O(2)#1-Cu(1)-O(1) | 92.28(5)   |                     |           |

#### Compound 4

|                     |            |                     |            |
|---------------------|------------|---------------------|------------|
| Co(1)-O(1)#1        | 2.1267(16) | O(2)#1-Co(1)-O(2)   | 180.00(7)  |
| Co(1)-O(1)          | 2.1267(16) | O(2)-Co(1)-N(1)#1   | 88.19(6)   |
| Co(1)-O(2) #1       | 2.1242(15) | O(2)#1-Co(1)-N(1)#1 | 91.81(6)   |
| Co(1)-O(2)          | 2.1242(15) | O(2)-Co(1)-N(1)     | 91.81(6)   |
| Co(1)-N(1)          | 2.1960(17) | O(2)#1-Co(1)-N(1)   | 88.19(6)   |
| Co(1)-N(1)#1        | 2.1959(17) | N(1)#1-Co(1)-N(1)#1 | 180.0      |
| Co(2)-O(5)#2        | 2.0524(15) | O(5)#2-Co(2)-O(5)#3 | 175.59(10) |
| Co(2)-O(5)#3        | 2.0524(15) | O(5)#3-Co(2)-O(6)   | 84.41(6)   |
| Co(2)-O(6) #4       | 2.1451(16) | O(5)#2-Co(2)-O(6)#4 | 84.41(6)   |
| Co(2)-O(6)          | 2.1451(16) | O(5)#3-Co(2)-O(6)#4 | 92.43(6)   |
| Co(2)-N(4)#4        | 2.1603(18) | O(5)#2-Co(2)-O(6)   | 92.43(6)   |
| Co(2)-N(4)          | 2.1603(18) | O(5)#2-Co(2)-N(4)#4 | 90.59(7)   |
| O(1)#1-Co(1)-O(1)   | 180.0      | O(5)#3-Co(2)-N(4)#4 | 92.52(6)   |
| O(1)-Co(1)-N(1)     | 89.96(6)   | O(5)#2-Co(2)-N(4)   | 92.52(6)   |
| O(1)#1-Co(1)-N(1)   | 90.04(6)   | O(5)#3-Co(2)-N(4)   | 90.59(7)   |
| O(1)-Co(1)-N(1)#1   | 90.03(6)   | O(6)#4-Co(2)-O(6)   | 88.74(10)  |
| O(1)#1-Co(1)-N(1)#1 | 89.96(6)   | O(6)#4-Co(2)-N(4)#4 | 174.94(7)  |
| O(2)#1-Co(1)-O(1)#1 | 62.22(6)   | O(6)#4 -Co(2)-N(4)  | 90.67(7)   |
| O(2) -Co(1)-O(1)    | 62.22(6)   | O(6) -Co(2)-N(4)    | 174.94(7)  |

|                   |           |                   |           |
|-------------------|-----------|-------------------|-----------|
| O(2)#1-Co(1)-O(1) | 117.79(6) | O(6)-Co(2)-N(4)#4 | 90.67(7)  |
| O(2)-Co(1)-O(1)#1 | 117.78(6) | N(4)#4-Co(2)-N(4) | 90.35(10) |

**Compound 5**

|                     |            |                     |           |
|---------------------|------------|---------------------|-----------|
| Ni(1)-O(1)          | 2.1009(15) | O(2)-Ni(1)-O(2)#1   | 180.00(5) |
| Ni(1)-O(1)#1        | 2.1009(14) | O(2)#1-Ni(1)-N(1)   | 88.44(6)  |
| Ni(1)-O(2)          | 2.0855(14) | O(2)-Ni(1)-N(1)     | 91.56(6)  |
| Ni(1)-O(2)#1        | 2.0856(14) | O(2)#1-Ni(1)-N(1)#1 | 91.56(6)  |
| Ni(1)-N(1)#1        | 2.1474(16) | O(2)-Ni(1)-N(1)#1   | 88.44(6)  |
| Ni(1)-N(1)          | 2.1473(16) | N(1)-Ni(1)-N(1)#1   | 180.00(6) |
| Ni(2)-O(5)#2        | 2.0382(14) | O(5)#2-Ni(2)-O(5)#3 | 176.02(9) |
| Ni(2)-O(5)#3        | 2.0382(14) | O(5)#2-Ni(2)-O(6)#4 | 92.81(6)  |
| Ni(2)-O(6)#4        | 2.1012(15) | O(5)#3-Ni(2)-O(6)#4 | 84.32(6)  |
| Ni(2)-O(6)          | 2.1013(15) | O(5)#2-Ni(2)-O(6)   | 84.32(6)  |
| Ni(2)-N(4)          | 2.1061(17) | O(5)#3-Ni(2)-O(6)   | 92.82(6)  |
| Ni(2)-N(4)#4        | 2.1061(17) | O(5)#2-Ni(2)-N(4)   | 91.97(6)  |
| O(1)-Ni(1)-O(1)#1   | 180.00(6)  | O(5)#3-Ni(2)-N(4)   | 90.83(6)  |
| O(1)-Ni(1)-N(1)#1   | 89.70(6)   | O(5)#3-Ni(2)-N(4)#4 | 91.97(6)  |
| O(1)#1-Ni(1)-N(1)#1 | 90.30(6)   | O(5)#2-Ni(2)-N(4)#4 | 90.83(6)  |
| O(1)#1-Ni(1)-N(1)   | 89.70(6)   | O(6)#4-Ni(2)-O(6)   | 88.03(9)  |
| O(1)-Ni(1)-N(1)     | 90.30(6)   | O(6)#4-Ni(2)-N(4)   | 174.99(7) |
| O(2)-Ni(1)-O(1)     | 63.27(6)   | O(6)-Ni(2)-N(4)#4   | 174.99(7) |
| O(2)#1-Ni(1)-O(1)#1 | 63.27(6)   | O(6)#4-Ni(2)-N(4)#4 | 90.97(6)  |
| O(2)-Ni(1)-O(1)#1   | 116.73(6)  | O(6)-Ni(2)-N(4)     | 90.97(6)  |
| O(2)#1-Ni(1)-O(1)   | 116.73(6)  | N(4)-Ni(2)-N(4)#4   | 90.43(10) |

Symmetry transformations used to generate equivalent atoms: for **1**: #1  $3/2-x, -1/2+y, 3/2-z$ . #2  $1-x, 1-y, -z$ . #3  $3/2-x, 1/2+y, 1/2-z$ . #4  $-1/2+x, 1/2-y, -1/2+z$ ; for **2**: #1  $1/2-x, -1/2+y, +z$ . #2  $+x, 3/2-y, -1/2+z$ ; for **3**: #1  $1-x, 1-y, 1-z$ . #2  $1-x, -y, 1-z$ . #3  $3/2-x, 1/2-y, 1-z$ ; for **4**: #1  $1-x, 1-y, 1-z$ . #2  $1/2+x, 3/2+y, +z$ . #3  $1/2-x, 3/2+y, 1/2-z$ . #4  $1-x, +y, 1/2-z$ ; for **5**: #1  $1/2-x, -1/2-y, 1-z$ . #2  $1/2+x, 3/2+y, +z$ . #3  $1/2-x, 3/2+y, 3/2-z$ . #4  $1-x, +y, 3/2-z$ .

---

**Table S2** Hydrogen bonds for **1-5** (Å and °).

| D-H···A                          | D···A  | D-H  | H···A | D-H···A |
|----------------------------------|--------|------|-------|---------|
| <b>Compound 1</b>                |        |      |       |         |
| O(7)-H(7A)···O(5) <sup>i</sup>   | 2.7249 | 0.88 | 1.97  | 143     |
| O(7)-H(7B)···O(4) <sup>ii</sup>  | 2.6717 | 0.88 | 1.89  | 148     |
| <b>Compound 2</b>                |        |      |       |         |
| O(6)-H(6B)···O(4) <sup>i</sup>   | 2.5994 | 0.79 | 1.85  | 160     |
| O(7)-H(7A)···O(4) <sup>ii</sup>  | 2.5942 | 0.85 | 1.78  | 159     |
| O(7)-H(7B)···O(4) <sup>iii</sup> | 2.8795 | 0.85 | 2.07  | 159     |
| <b>Compound 3</b>                |        |      |       |         |
| N(4)-H(4)···O(4) <sup>i</sup>    | 2.7149 | 0.86 | 1.91  | 156     |
| O(6)-H(6)···N(5) <sup>ii</sup>   | 2.7610 | 0.82 | 1.98  | 159     |
| <b>Compound 4</b>                |        |      |       |         |
| O(6)-H(6A)···N(3) <sup>i</sup>   | 2.9151 | 0.87 | 2.07  | 162     |
| O(7)-H(7A)···O(4) <sup>ii</sup>  | 3.1744 | 0.85 | 2.49  | 139     |
| O(7)-H(7B)···O(6) <sup>iii</sup> | 2.8999 | 0.76 | 2.20  | 153     |
| <b>Compound 5</b>                |        |      |       |         |
| O(6)-H(6B)···N(3) <sup>i</sup>   | 2.9300 | 0.87 | 2.08  | 163     |
| O(7)-H(7A)···O(4) <sup>ii</sup>  | 3.1725 | 0.85 | 2.46  | 143     |
| O(7)-H(7B)···O(6) <sup>ii</sup>  | 2.8839 | 0.61 | 2.35  | 148     |

Symmetry transformations used to generate equivalent atoms: for **1**: i  $-1/2+x$ ,  $-1/2+y$ ,  $z$ . ii  $-x$ ,  $-1+y$ ,  $1/2-z$ ; for **2**: i  $1/2-x$ ,  $-y$ ,  $1/2+z$ . ii  $1/2+x$ ,  $1/2-y$ ,  $-z$ . iii  $1/2-x$ ,  $1/2+y$ ,  $z$ .; for **3**: i  $x$ ,  $-y$ ,  $1/2+z$ . ii  $x$ ,  $y$ ,  $-1+z$ ; for **4**: i  $1+x$ ,  $1-y$ ,  $1/2+z$ . ii  $1/2-x$ ,  $1/2+y$ ,  $1/2-z$ . iii  $-1/2+x$ ,  $1/2+y$ ,  $z$ ; for **5**: i  $1/2-x$ ,  $1/2-y$ ,  $1-z$ . ii  $1/2-x$ ,  $1/2+y$ ,  $1/2-z$ .

**Table S3** Coordination modes of the ligands in **1-5**.

| Compound | Trigonal N-donor ligand coordination mode                                                    | Polycarboxylate ligand coordination mode(s)                                                   |
|----------|----------------------------------------------------------------------------------------------|-----------------------------------------------------------------------------------------------|
| 1        | 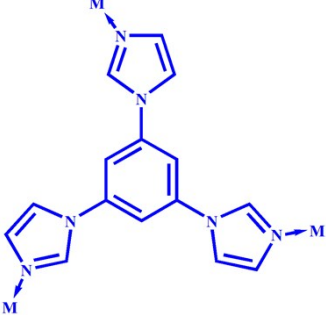<br>tib     | <br>1,3-bdc |
| 2        | <br>tib    | <br>1,3-bdc |
| 3        | <br>Htpim | <br>Hbtc  |
| 4&5      | <br>pytpy | <br>oba   |

## Compound 1

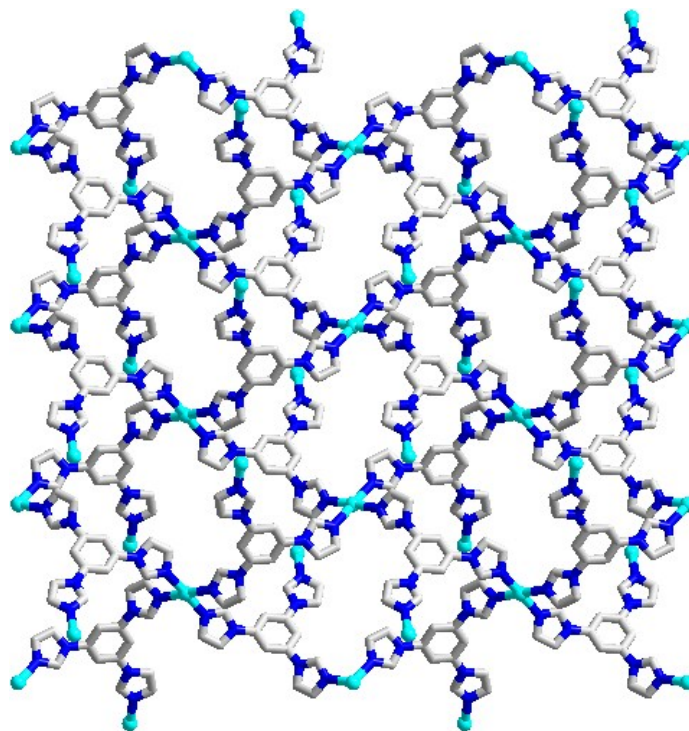

**Fig. S1** View of a single 2D layer formed by tib ligands and Co atoms.

## Compound 2

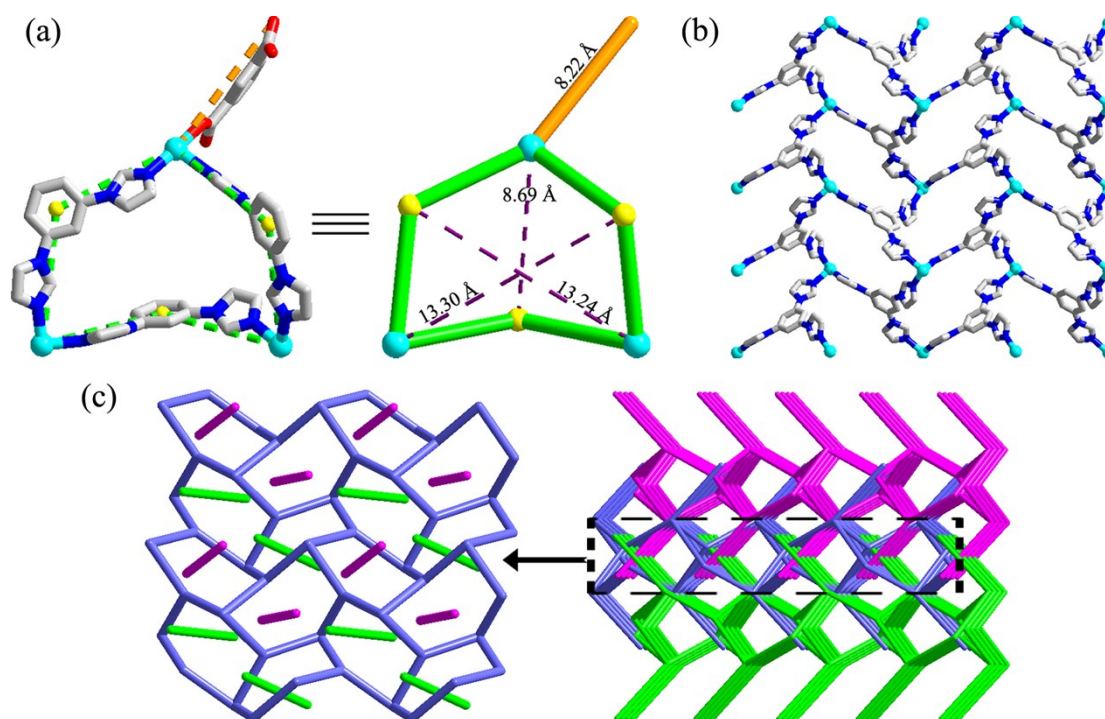

**Fig. S2** (a) Perspective and simplified views of a hexagonal window with an orange lateral arm. (b) View of a single 2D layer formed by tib ligands and Ni atoms. (c) Every hexagonal void of each layer is pierced by one arm coming from above or below layers alternately.

### Compound 3

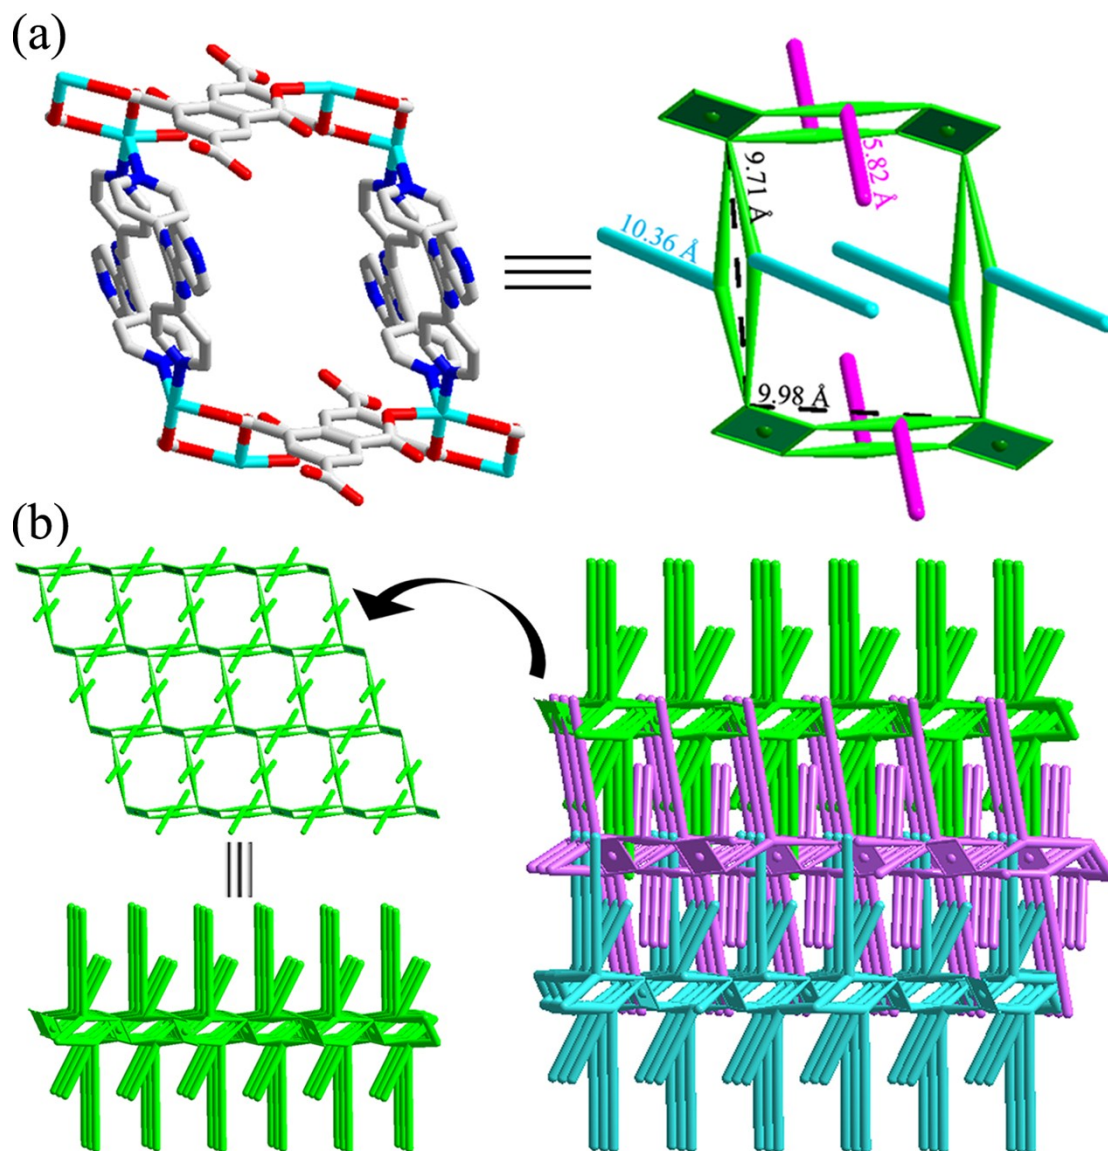

**Fig. S3** (a) Perspective and simplified views of a single tetragonal window. The Htpim and Hbtc ligands are highlighted by cerulean and purple lines with effective length respectively. (b) Schematic views of a single double-edged 2D network with two distinct dangling arms (left) and the mutual polythreading and interdigitation of three layers (right).

### Compounds 4 & 5

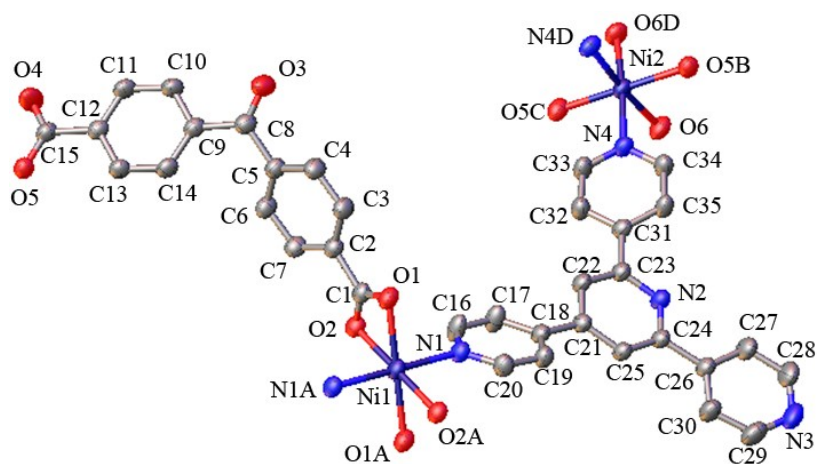

**Fig. S4** ORTEP diagram showing the coordination environment for Ni atoms in **5**.

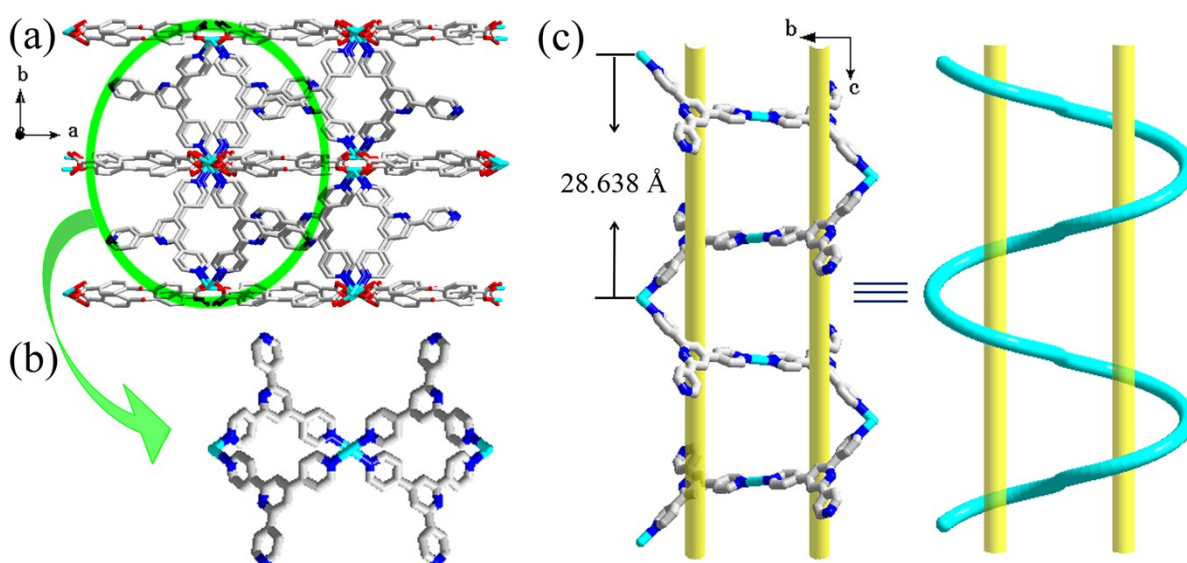

**Fig. S5** (a) Perspective view of a single 3D net. (b) Side view of a single-stranded *meso*-helix. (c) Perspective (left) and schematic (right) views of the *meso*-helix.

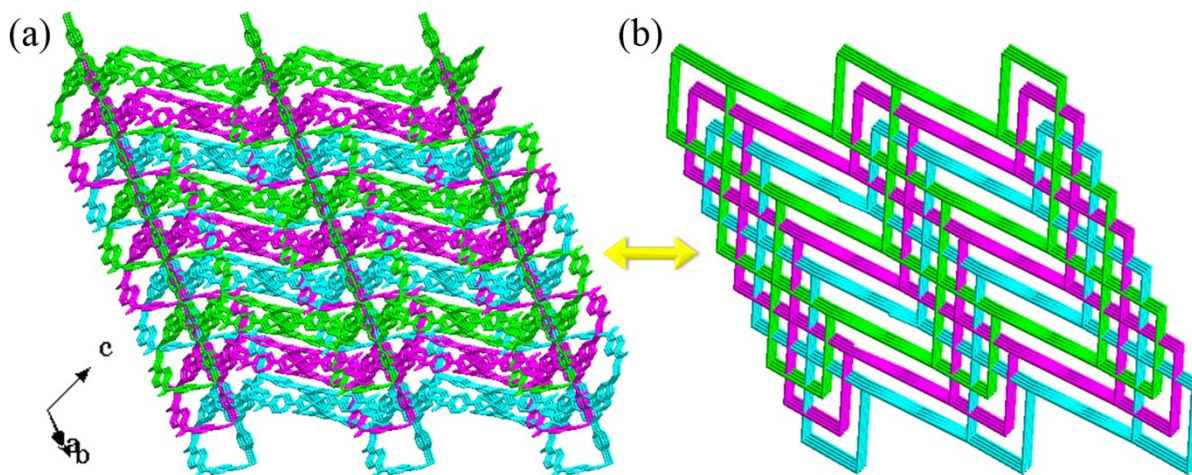

**Fig. S6** Perspective (a) and simplified (b) views of 3-fold 3D interpenetrating framework.



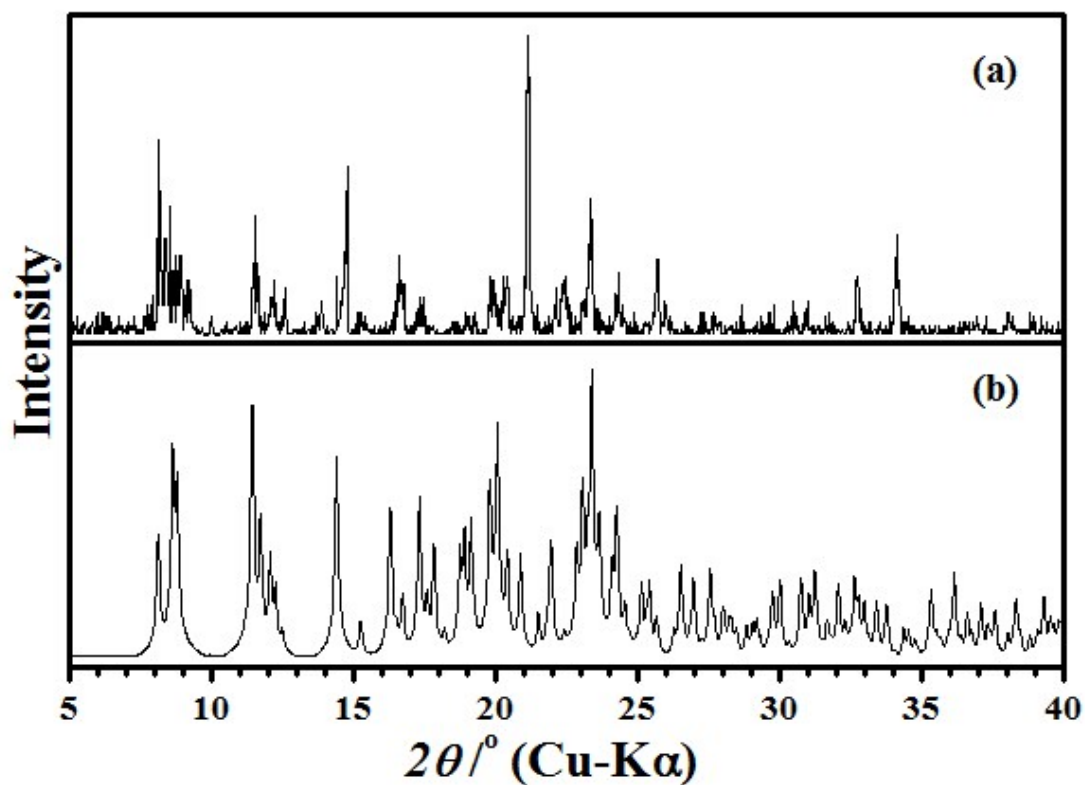

**Fig. S7** The XRPD patterns for: (a) as-synthesized samples of **1**, and (b) simulated one based on the single-crystal structure of **1**.

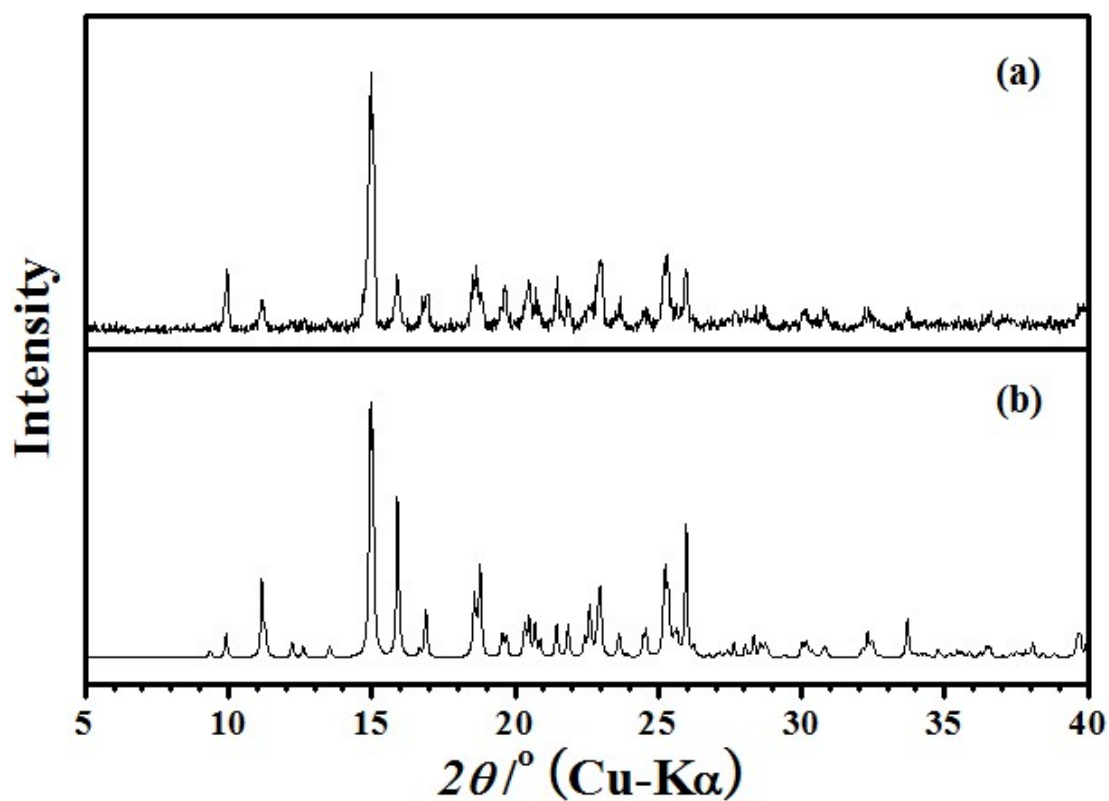

**Fig. S8** The XRPD patterns for: (a) as-synthesized samples of **2**, and (b) simulated one based on the single-crystal structure of **2**.

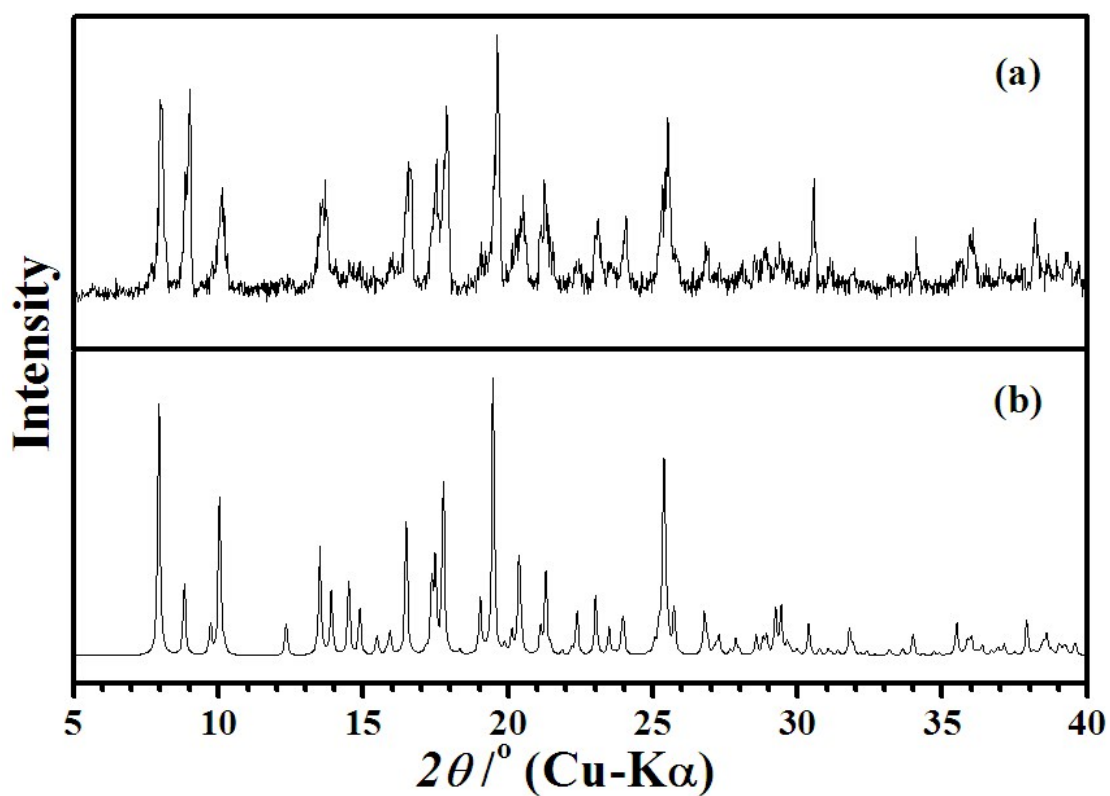

**Fig. S9** The XRPD patterns for: (a) as-synthesized samples of 3, and (b) simulated one based on the single-crystal structure of 3.

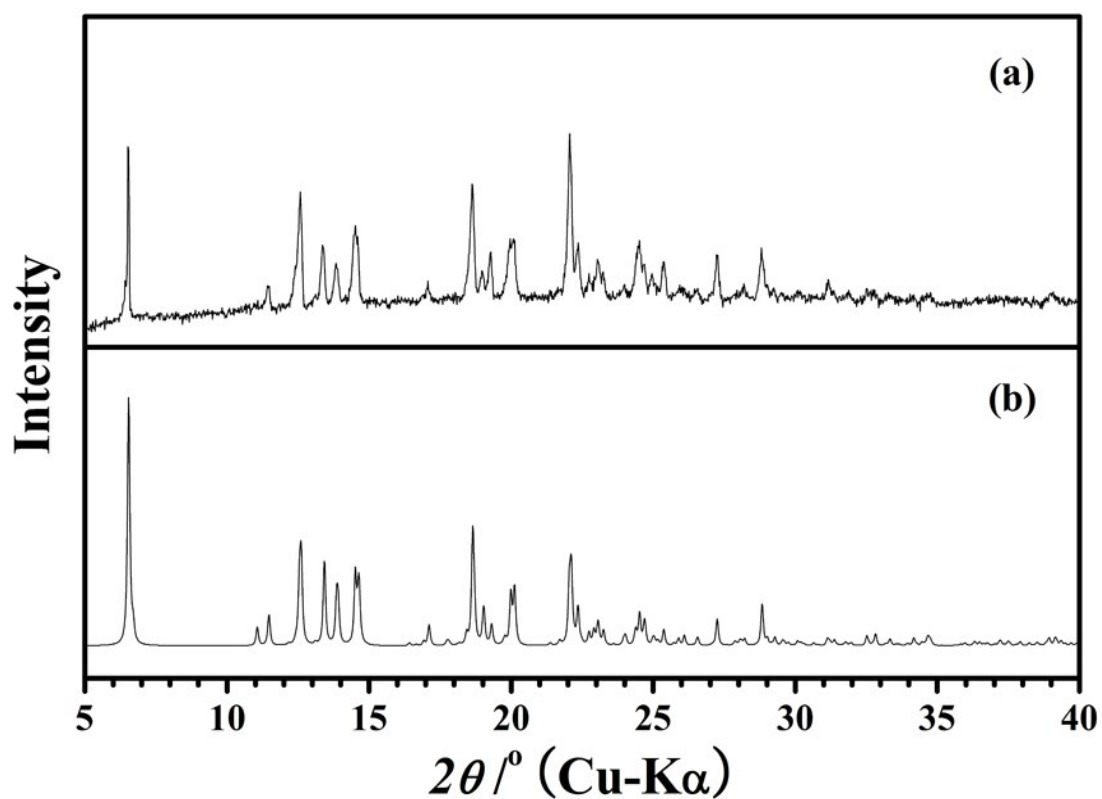

**Fig. S10** The XRPD patterns for: (a) as-synthesized samples of 4, and (b) simulated one based on the single-crystal structure of 4.

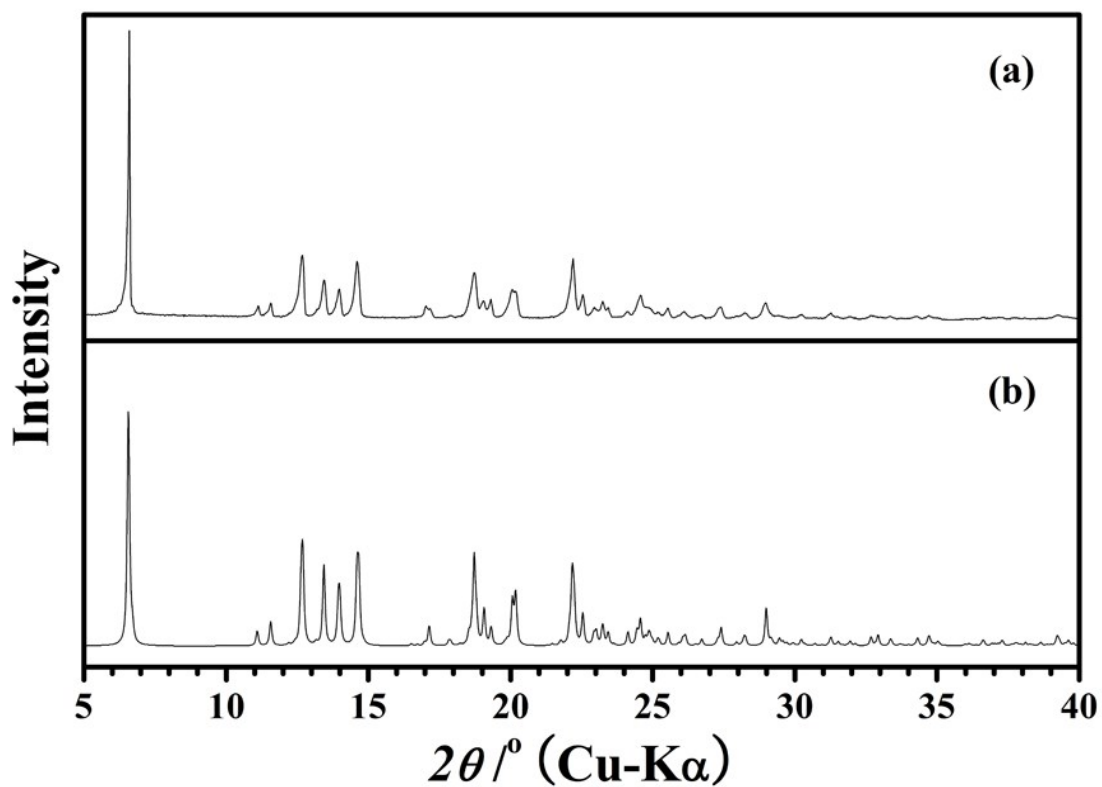

**Fig. S11** The XRPD patterns for: (a) as-synthesized samples of **5**, and (b) simulated one based on the single-crystal structure of **5**.

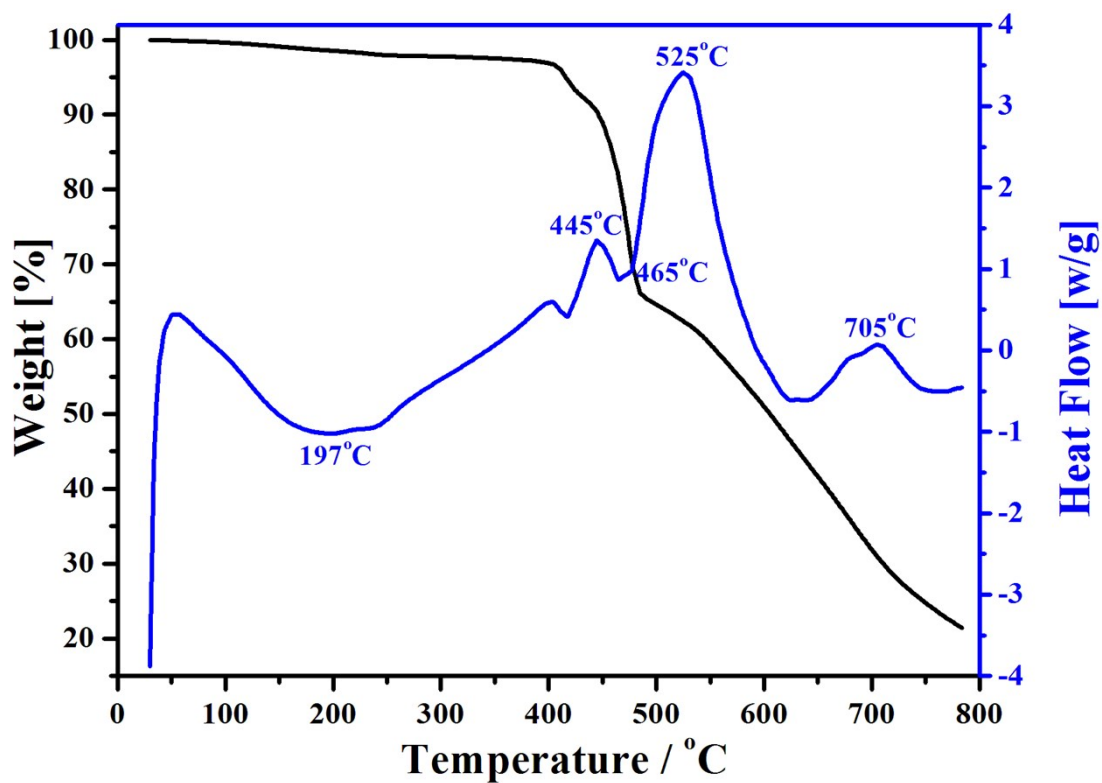

**Fig. S12** The TG-DSC curves of compound **1**.

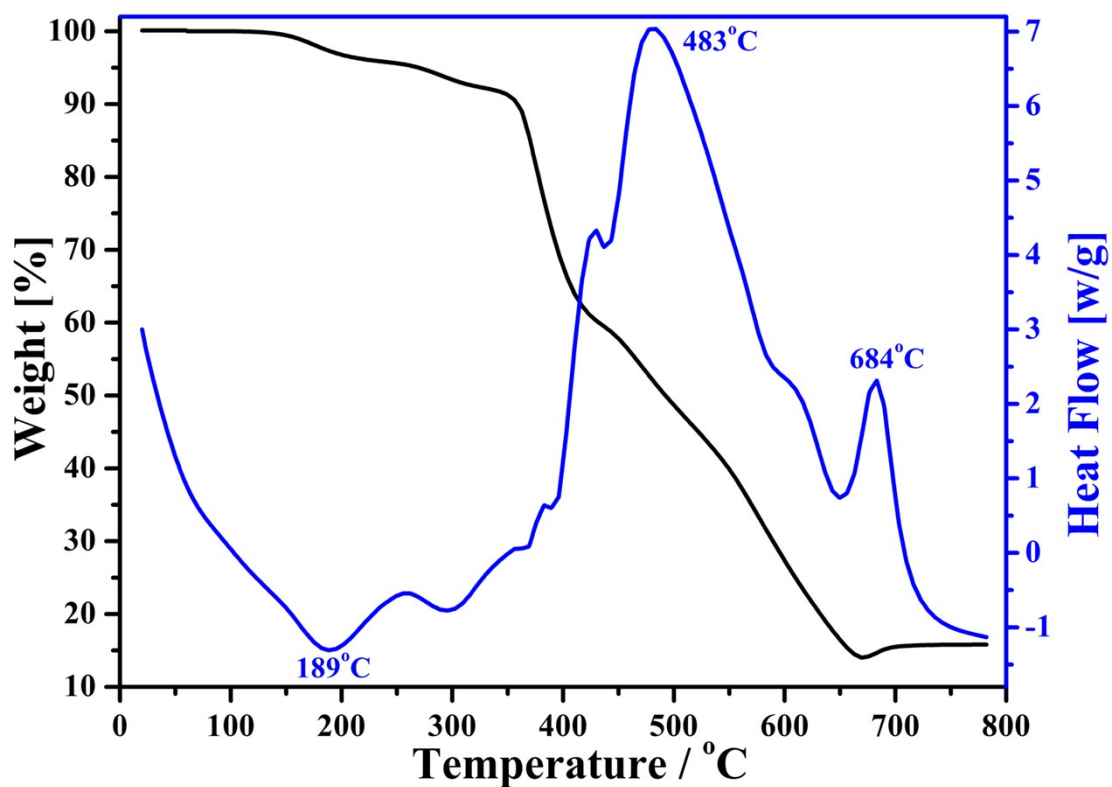

Fig. S13 The TG-DSC curves of compound 2.

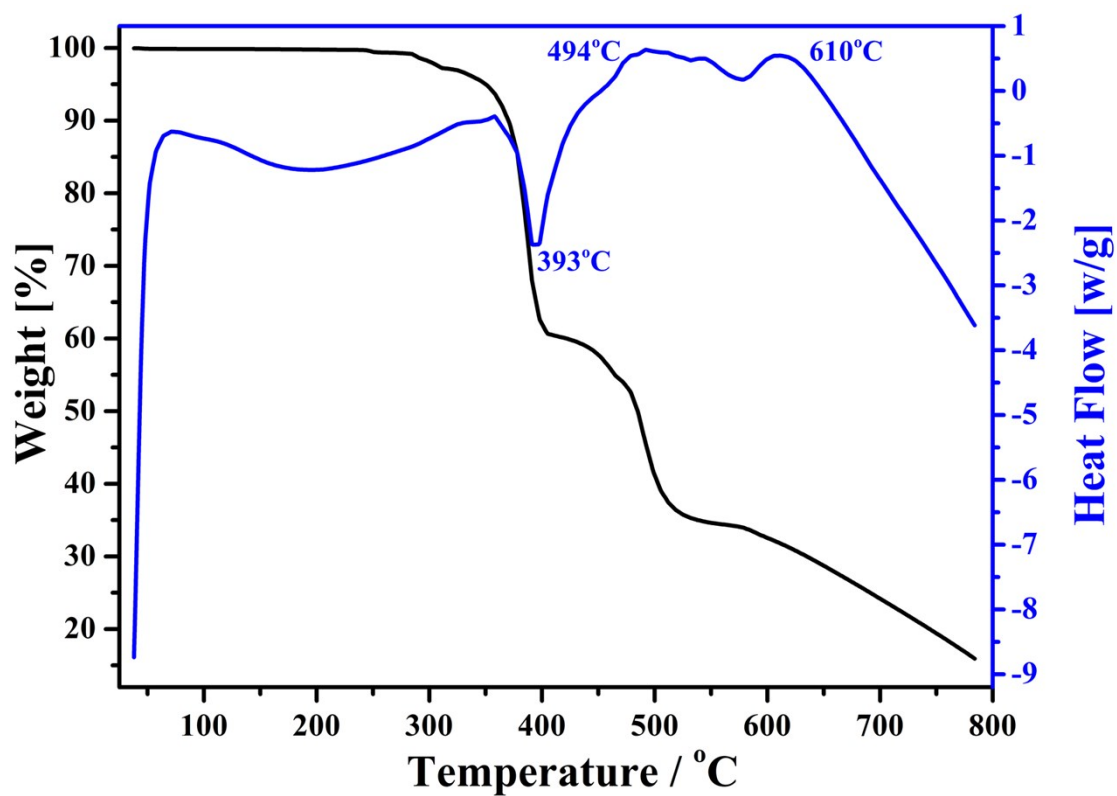

Fig. S14 The TG-DSC curves of compound 3.

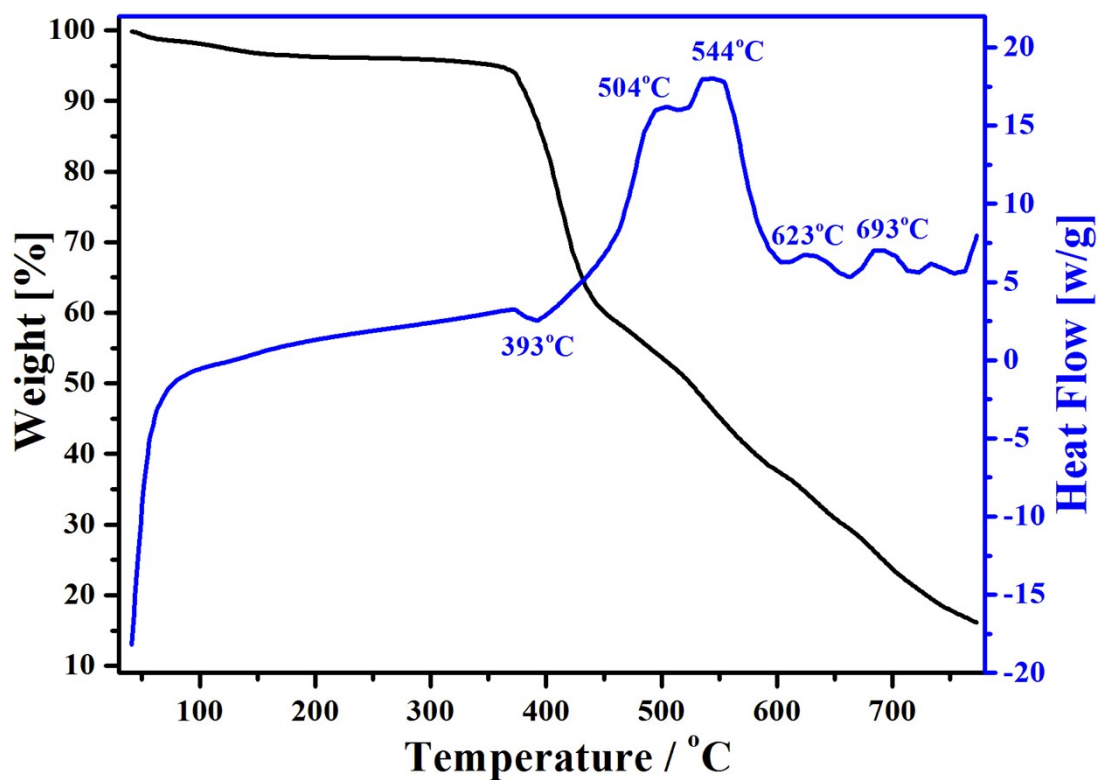

Fig. S15 The TG-DSC curves of compound 4.

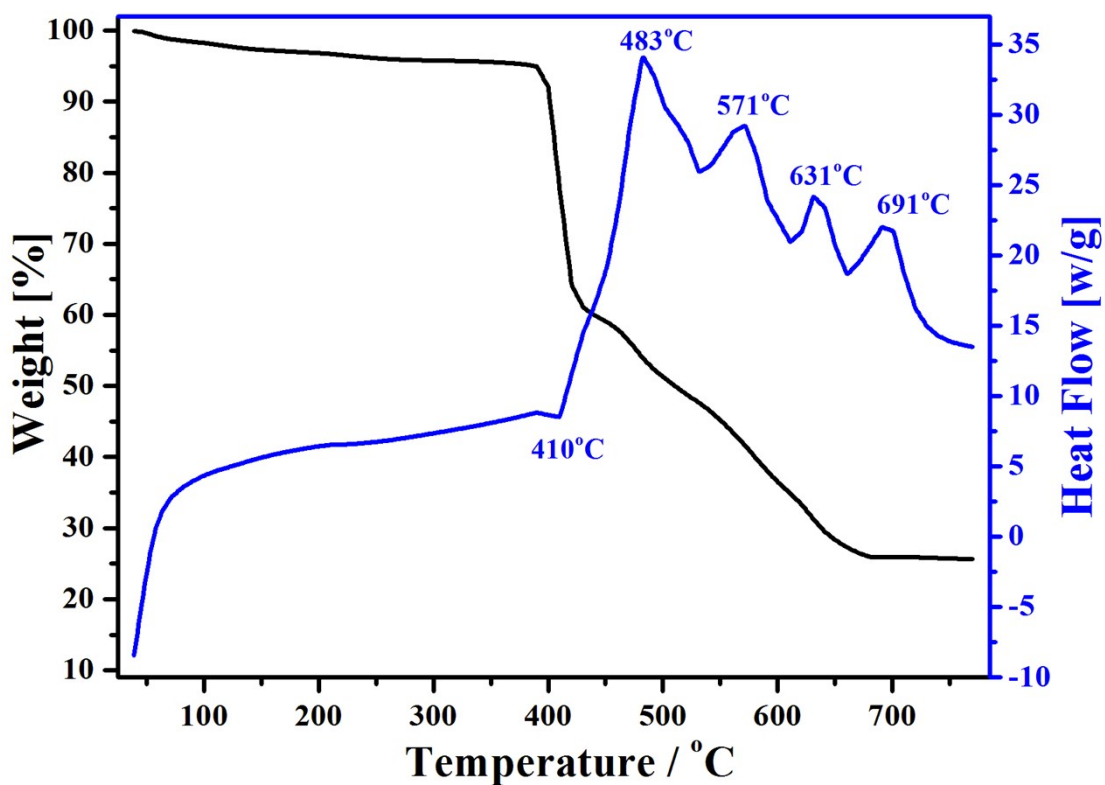

Fig. S16 The TG-DSC curves of compound 5.

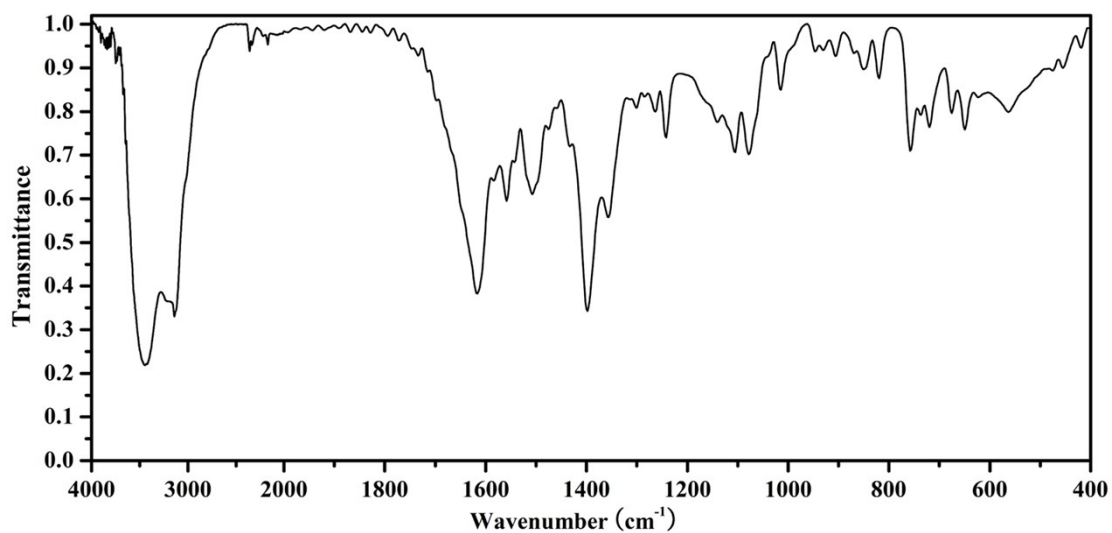

**Fig. S17** The IR spectrum of compound 1.

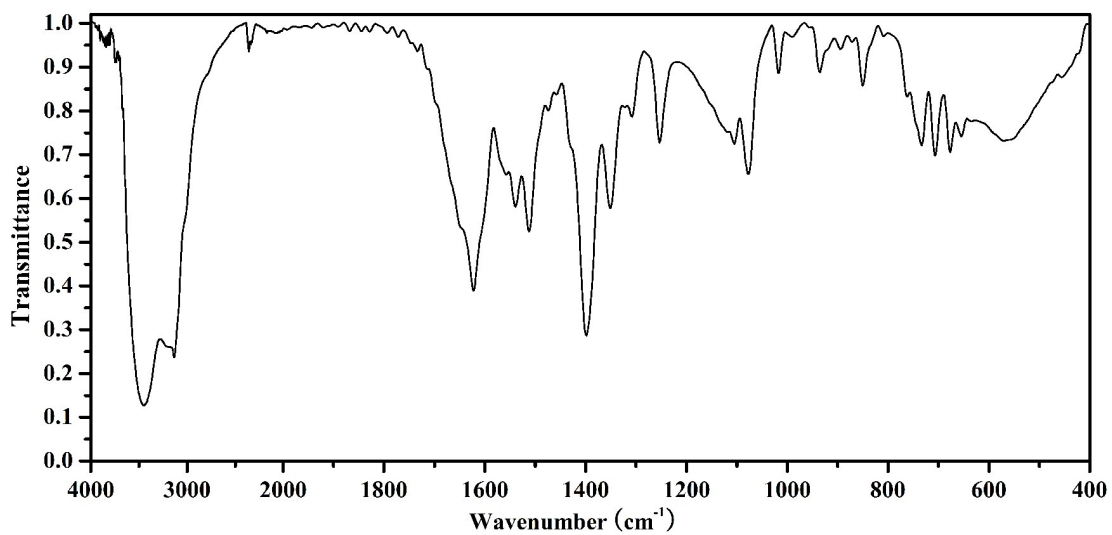

**Fig. S18** The IR spectrum of compound 2.

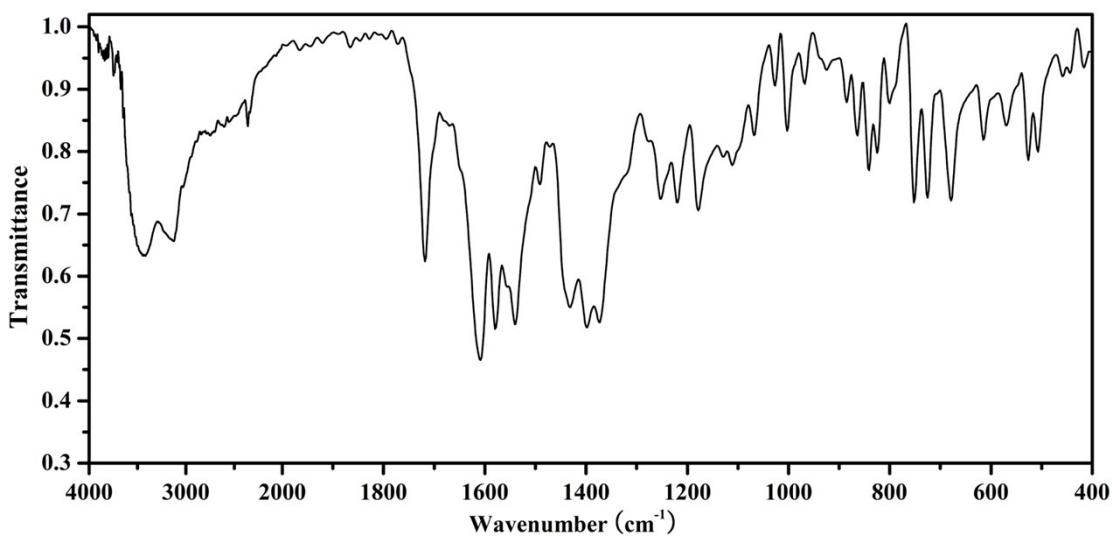

**Fig. S19** The IR spectrum of compound 3.

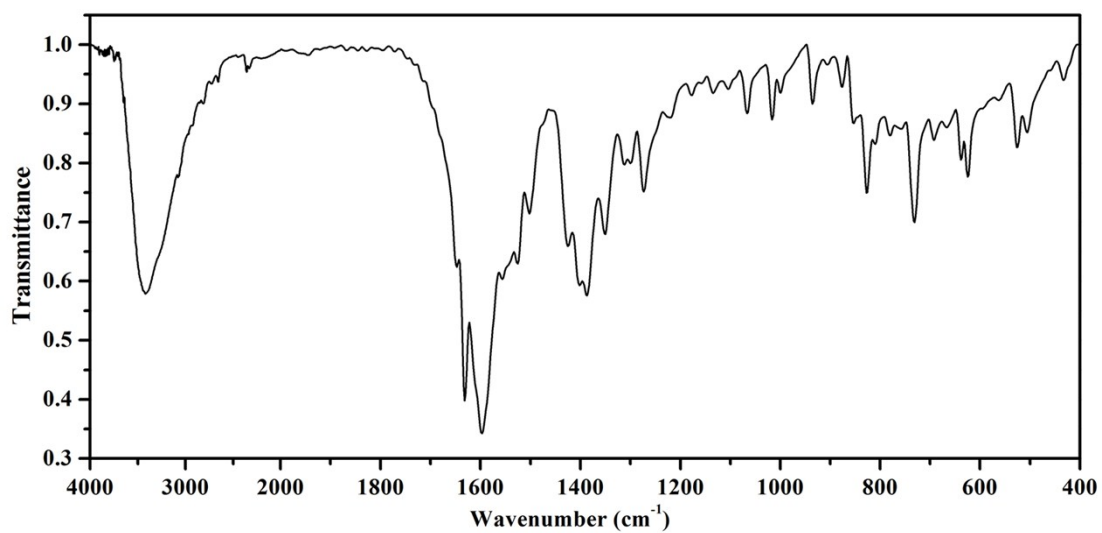

**Fig. S20** The IR spectrum of compound **4**.

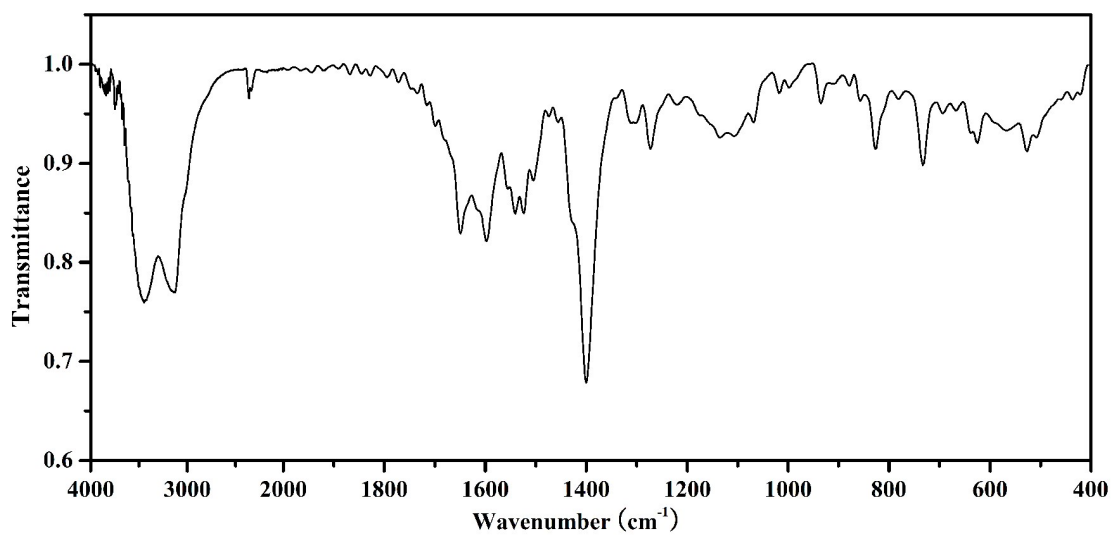

**Fig. S21** The IR spectrum of compound **5**.
